# Supplementary material for: Coevolution of cooperative lifestyles and low cancer incidence in mammals
Source: Research Square preprint supplement (doi:10.21203/rs.3.rs-5241807/v1), 2024-10-14
Supplement: Supplementary file 1 [file 0521190b059b5f0470dee2b3.xlsx]

## Sheet: Raw_data
species	common_name	order	family	genus	total_necropsies	any_neoplasia	any_no_neoplasia	any_malignant	prop_neoplasia	prop_malignant	adult_mass_kg	metabolic_rate	max_lifespan_yr	gestation_length_d	litter_size_n	litters	total_litters	breeding_system	paternal_care	group_living
Phoca_vitulina	Harbor seal	Carnivora	Phocidae	Phoca	33	2	31	2	0.0606061	0.0606061	94.2833	73.29	47.6	253.57	1	Monotocous	43.6595	PluralBreeder	No	yes
Equus_asinus	Burro and Sardinian ass	Perissodactyla	Equidae	Equus	9	1	8	0	0.111111	0	NA	164.92	47	NA	NA	NA	NA	PluralBreeder	No	no
Cercopithecus_mitis	Guenon	Primates	Cercopithecidae	Cercopithecus	41	4	37	4	0.097561	0.097561	6.1165	19.276	37.8	136.962	1	Monotocous	16.3726	PluralBreeder	No	yes
Papio_hamadryas	Baboon	Primates	Cercopithecidae	Papio	12	0	12	0	0	0	18	21.095	37.5	179.277	1	Monotocous	32.53	PluralBreeder	No	yes
Pecari_tajacu	Collared peccary	Artiodactyla	Tayassuidae	Pecari	11	0	11	0	0	0	20.5	33.165	31.5	143.359	1.82	Polytocous	111.43	PluralBreeder	No	yes
Saimiri_sciureus	Squirrel monkey	Primates	Cebidae	Saimiri	13	0	13	0	0	0	0.8367	4.429	30.2	164.09	1	Monotocous	29.1169	PluralBreeder	No	yes
Lama_glama	Llama	Artiodactyla	Camelidae	Lama	6	0	6	0	0	0	NA	148.94	28.9	NA	NA	NA	NA	PluralBreeder	No	yes
Panthera_leo	Lion	Carnivora	Felidae	Panthera	18	1	17	1	0.0555556	0.0555556	149.062	94.58	27	109	2.825	Polytocous	76.275	PluralBreeder	No	yes
Dendrolagus_matschiei	Matschie's tree kangaroo	Diprotodontia	Macropodidae	Dendrolagus	11	0	11	0	0	0	7.08	7.96	26.9	32.975	1.005	Monotocous	25.3014	NA	NA	NA
Panthera_tigris	Tiger	Carnivora	Felidae	Panthera	11	2	9	1	0.181818	0.0909091	128.8	133.859	26.3	105.19	2.57	Polytocous	23.4652	SingularBreeder	No	no
Macropus_rufus	Red kangaroo	Diprotodontia	Macropodidae	Macropus	9	0	9	0	0	0	35.7292	31.353	25	33	1	Monotocous	38.8736	NA	NA	NA
Connochaetes_gnou	White-tailed gnu	Artiodactyla	Bovidae	Connochaetes	16	0	16	0	0	0	132.25	NA	24.3	258.723	1	Monotocous	19.1971	PluralBreeder	No	yes
Puma_concolor	Cougar	Carnivora	Felidae	Puma	5	0	5	0	0	0	48	49.326	23.8	92.3	2.76	Polytocous	27.6321	SingularBreeder	No	no
Dasypus_novemcinctus	Armadillo	Cingulata	Dasypodidae	Dasypus	67	2	65	0	0.0298507	0	3.94901	4.655	22.3	133	4	Polytocous	85.1103	SingularBreeder	No	no
Phascolarctos_cinereus	Koala	Diprotodontia	Phascolarctidae	Phascolarctos	74	21	53	16	0.283784	0.216216	5.64687	5.744	22.1	31	1.005	Monotocous	20.4318	NA	NA	NA
Macropus_robustus	Common wallaroo	Diprotodontia	Macropodidae	Macropus	30	0	30	0	0	0	29.6479	33.056	22	33.295	1	Monotocous	29.1766	NA	NA	NA
Alces_alces	Moose	Artiodactyla	Cervidae	Alces	13	0	13	0	0	0	359.75	286.847	22	241.975	1.28	Monotocous	35.8586	PluralBreeder	No	no
Rangifer_tarandus	Reindeer	Artiodactyla	Cervidae	Rangifer	17	2	15	2	0.117647	0.117647	101.25	119.66	21.7	222.5	1.1	Monotocous	21.775	PluralBreeder	No	yes
Procyon_lotor	Raccoon	Carnivora	Procyonidae	Procyon	12	0	12	0	0	0	5.075	10.428	21	63.914	3.39	Polytocous	67.8	SingularBreeder	No	no
Acinonyx_jubatus	Cheetah	Carnivora	Felidae	Acinonyx	42	9	33	4	0.214286	0.0952381	50.5779	61.77	20.5	90.12	3.04	Polytocous	40.1318	SingularBreeder	No	no
Callithrix_pygmaea	Pygmy marmoset	Primates	Cebidae	Callithrix	28	1	27	1	0.0357143	0.0357143	NA	NA	18.6	NA	NA	NA	NA	SingularBreeder	Yes	no
Lycaon_pictus	Cape hunting dog	Carnivora	Canidae	Lycaon	6	3	3	1	0.5	0.166667	24.25	33.01	17	72	7.495	Polytocous	112.964	SingularBreeder	Yes	NA
Canis_mesomelas	Black-backed jackal	Carnivora	Canidae	Canis	5	1	4	1	0.2	0.2	8.2473	21.533	16.7	62.5	3.95	Polytocous	62.621	SingularBreeder	Yes	NA
Callithrix_jacchus	Marmoset	Primates	Cebidae	Callithrix	40	5	35	5	0.125	0.125	0.2552	0.848	16.5	144	2.24	Polytocous	96.252	SingularBreeder	Yes	NA
Vulpes_zerda	Fennec fox	Carnivora	Canidae	Vulpes	4	0	4	0	0	0	1.2075	2.693	16.3	51	2.36	Polytocous	36.5667	SingularBreeder	No	NA
Tarsius_syrichta	Tarsier	Primates	Tarsiidae	Tarsius	8	0	8	0	0	0	NA	NA	16	NA	NA	NA	NA	SingularBreeder	No	NA
Macropus_parma	Parma wallaby	Diprotodontia	Macropodidae	Macropus	59	4	55	2	0.0677966	0.0338983	4.20331	NA	15.9	34.33	0.95	Monotocous	17.9038	NA	NA	NA
Antilocapra_americana	Pronghorn	Artiodactyla	Antilocapridae	Antilocapra	20	1	19	1	0.05	0.05	45.375	50.973	15.5	247.445	1.89	Polytocous	26.4945	PluralBreeder	No	yes
Hydrochaeris_hydrochaeris	Capybara	Rodentia	Caviidae	Hydrochoerus	13	0	13	0	0	0	51.5725	NA	15.1	150.73	3.485	Polytocous	60.3157	NA	No	yes
Macropus_eugenii	Dama wallaby	Diprotodontia	Macropodidae	Macropus	11	0	11	0	0	0	5.03724	7.78	15.1	28.945	1.005	Monotocous	14.2285	NA	NA	NA
Procavia_capensis	Rock hyrax	Hyracoidea	Procaviidae	Procavia	91	5	86	2	0.0549451	0.021978	2.75	4.954	14.8	226.449	2.44	Polytocous	32.7899	PluralBreeder	No	yes
Sarcophilus_harrisii	Tasmanian devil	Dasyuromorphia	Dasyuridae	Sarcophilus	18	8	10	6	0.444444	0.333333	6.5	8.664	13	26	2.94	Polytocous	32.507	NA	NA	NA
Tupaia_glis	Tree shrew	Scandentia	Tupaiidae	Tupaia	10	1	9	1	0.1	0.1	0.159	0.522	12.4	46	2.22	Polytocous	67.2949	SingularBreeder	No	no
Cynomys_ludovicianus	Prairie dog	Rodentia	Sciuridae	Cynomys	31	14	17	14	0.451613	0.451613	1.125	2.358	11	35.415	4.43	Polytocous	70.0469	PluralBreeder	No	yes
Didelphis_virginiana	Virginia opossum	Didelphimorphia	Didelphidae	Didelphis	28	17	11	15	0.607143	0.535714	1.4145	5.299	6.6	12.345	6.645	Polytocous	86.3304	SingularBreeder	No	no
Rhabdomys_pumilio	Striped grass mouse	Rodentia	Muridae	Rhabdomys	13	0	13	0	0	0	0.045865	0.179	4.5	25.262	6	Polytocous	104.438	PluralBreeder	No	no

## Sheet: References
Variable	Note	Reference
species		https://doi.org/10.1093/emph/eoaa015
common_name		https://doi.org/10.1093/emph/eoaa015
order		https://doi.org/10.1093/emph/eoaa015
family		https://doi.org/10.1093/emph/eoaa015
genus		https://doi.org/10.1093/emph/eoaa015
total_necropsies		https://doi.org/10.1093/emph/eoaa015
any_neoplasia		https://doi.org/10.1093/emph/eoaa015
any_malignant		https://doi.org/10.1093/emph/eoaa015
prop_neoplasia		https://doi.org/10.1093/emph/eoaa015
prop_malignant		https://doi.org/10.1093/emph/eoaa015
adult_mass_kg		https://doi.org/10.1002/ecy.3344
metabolic_rate		https://doi.org/10.1093/nar/gkx1042
max_lifespan_yr		https://doi.org/10.1002/ecy.3344
gestation_length_d		https://doi.org/10.1002/ecy.3344
litter_size_n		https://doi.org/10.1002/ecy.3344
litters	Calculated (see "Methods")	-
total_litters	Calculated (see "Methods")	-
breeding_system		https://doi.org/10.1093/beheco/araa039
paternal_care		https://doi.org/10.1093/beheco/araa039
group_living	Multiple references (see "Methods")	https://doi.org/10.1111/j.1558-5646.2007.00229.x / https://doi.org/10.1126/science.1238677

## Sheet: Metadata
Variable	Definition	Data type
species	Binomial scientific name of the species.	Character
common_name	Widely recognized or vernacular name of a species, used to identify it in everyday language, as opposed to its scientific name.	Character
order	Order name of the species.	Character
family	Family name of the species.	Character
genus	Genus name of the species.	Character
total_necropsies	Total number of individuals necropsied.	Numeric
any_neoplasia	Total number of neoplasia diagnosed (malignant and benign).	Numeric
any_no_neoplasia	Total number of individuals necropsied ("total_necropsies") substracting the total number of neoplasia. ("any_neoplasia")	Numeric
any_malignant	Number of malignant neoplasia diagnosed.	Numeric
prop_neoplasia	Proportion of number of neoplasia diagnosed (any_neoplasia) and the total number of necropsies (total_necropsies)	Numeric
prop_malignant	Proportion of number of neoplasia diagnosed (any_malignant) and the total number of necropsies (total_necropsies)	Numeric
adult_mass_kg	Body mass of an adult individual in kilograms.	Numeric
metabolic_rate	Metabolic rate of the species in Watts (W).	Numeric
max_lifespan_yr	Maximum reported age at death for the species in years.	Numeric
gestation_length_d	Duration of fetal growth in days.	Numeric
litter_size_n	Number of offspring born per litter per female.	Numeric
litters	A classification variable that distinguishes species based on their litter size. It categorizes species as either "monotocous" (typically producing one offspring per litter) or "polytocous" (producing more than one offspring per litter), with a litter size threshold of 1.5.	Binary (monotocous, polytocous)
total_litters	Total Litters born per female in a lifetime. Calculated as the number of litters per year multiplied by litter size and the difference between the maximum longevity and female sexual maturity for each species.	Numeric
breeding_system	A variable indicating whether females occupy a shared territory or separate territories during the breeding season. It is categorized as either SingularBreeder (females in separate territories) or PluralBreeder (females in a common territory).	Binary (SingularBreeder, PluralBreeder)
paternal_care	A variable indicating whether males provide care or assistance to offspring. It is categorized as either "Yes" (males provide paternal care) or "No" (males do not provide paternal care).	Binary (Yes, No)
group_living	A variable indicating whether a species lives in social groups with regular interactions among individuals. It is categorized as either "yes" (the species engages in group living) or "no" (the species does not).	Binary (yes, no)
*Values referred to as NA mean data is not available
