# Supplementary material for: Coevolution of cooperative lifestyles and low cancer incidence in mammals
Source: Research Square preprint supplement (doi:10.21203/rs.3.rs-5241807/v1), 2024-10-14
Supplement: Supplementary file 1 [file d90b50eb84a4030cc996fff8.pdf]

**Supplementary Table 1:** CMR data gathered from mammals in zoos worldwide, providing high-resolution cause-of-death data. File format: Microsoft Excel Worksheet (.xlsx)

**Supplementary Table 2:** Cancer incidence estimated as the prevalence of any neoplasm in mammalian species from San Diego's zoos. File format: Microsoft Excel Worksheet (.xlsx)

**Supplementary Table 3:** Subsets of species with the highest and lowest prevalence of malignant neoplasms, incorporating those species reported as examples of rare or no cancer incidence. File format: Microsoft Excel Worksheet (.xlsx)

**Supplementary Table 4:** Breeding System Index as the ratio between plural and singular breeding species within each order. File format: Microsoft Excel Worksheet (.xlsx)
