# Supplementary material for: Coevolution of cooperative lifestyles and low cancer incidence in mammals
Source: Research Square preprint supplement (doi:10.21203/rs.3.rs-5241807/v1), 2024-10-14
Supplement: Supplementary file 2 [file 158e5c5870ac9ff453fe051a.xlsx]

## Sheet: Raw_data
common_name	species	malignancy_prevalence	malignancy_prevalence reference	group_living	group_living_reference	breeding_system	adult_mass_kg	log_adult_mass_kg	log_adult_mass_kg_category	metabolic_rate_W	log_metabolic_rate_W	log_metabolic_rate_W_category	metabolic_rate_reference	max_lifespan_d	log_max_lifespan_d	log_max_lifespan_d_category	litter_size	litters
Four-toed hedgehog (African pygmy hedgehog)	Atelerix albiventris	High	https://doi.org/10.21203/rs.3.rs-3117313/v1	no	https://doi.org/10.1111/j.1558-5646.2007.00229.x / https://doi.org/10.1126/science.1238677	Singular	0.45	-0.798508	<1	0.828	-0.188742	<1	https://doi.org/10.1111/j.1474-9726.2008.00442.x	4161	8.33351	<9	4.49	polytocous
Grey wolf	Canis lupus	High	https://doi.org/10.21203/rs.3.rs-3117313/v1	no	https://doi.org/10.1111/j.1558-5646.2007.00229.x / https://doi.org/10.1126/science.1238677	Singular	29.1908	3.37385	>1					7519	8.92519	<9 **	4.98	polytocous
Kowari	Dasyuroides byrnei	High	https://doi.org/10.1016/j.jcpa.2017.01.001				0.105	-2.25379	<1	0.439	-0.823256	<1	https://doi.org/10.1111/j.1474-9726.2008.00442.x	2920	7.97934	<9	6	polytocous
Virginia opossum	Didelphis virginiana	High	https://doi.org/10.21203/rs.3.rs-3117313/v1	no	https://doi.org/10.1111/j.1558-5646.2007.00229.x / https://doi.org/10.1126/science.1238677	Singular	1.4145	0.346776	<1	5.299	1.66752	>1	https://doi.org/10.1111/j.1474-9726.2008.00442.x	2555	7.84581	<9	6.645	polytocous
Ring-tailed lemur	Lemur catta	High	https://doi.org/10.21203/rs.3.rs-3117313/v1	yes	https://doi.org/10.1111/j.1558-5646.2007.00229.x / https://doi.org/10.1126/science.1238677	Plural	2.555	0.938052	<1					13614.5	9.51889	>9	1.105	monotocous
Cape hunting dog	Lycaon pictus	High	https://doi.org/10.21203/rs.3.rs-3117313/v1	yes	https://doi.org/10.1515/9780691207247-025	Singular	24.25	3.18842	>1	33.01	3.49681	>1	https://doi.org/10.1111/j.1474-9726.2008.00442.x	6205	8.73311	<9	7.495	polytocous
Common mouse	Mus musculus	High	https://doi.org/10.21203/rs.3.rs-3117313/v1				0.0205	-3.88733	<1	0.271	-1.30564	<1	https://doi.org/10.1111/j.1474-9726.2008.00442.x	2190	7.69166	<9	6.07	polytocous
Ferret	Mustela putorius	High	https://doi.org/10.21203/rs.3.rs-3117313/v1	no	https://doi.org/10.1111/j.1558-5646.2007.00229.x / https://doi.org/10.1126/science.1238677	Singular	0.809	-0.211956	<1					5110	8.53895	<9	7.68	polytocous
Jaguar	Panthera onca	High	https://doi.org/10.21203/rs.3.rs-3117313/v1	no	https://doi.org/10.1111/j.1558-5646.2007.00229.x / https://doi.org/10.1126/science.1238677	Singular	81.15	4.3963	>1	62.419	4.13387	>1	https://doi.org/10.1111/j.1474-9726.2008.00442.x	10353.8	9.24511	>9	2	polytocous
Snow leopard	Panthera uncia	High	https://doi.org/10.21203/rs.3.rs-3117313/v1	no	https://doi.org/10.1111/j.1558-5646.2007.00229.x / https://doi.org/10.1126/science.1238677		47.8125	3.86729	>1					7738	8.9539	<9	2.12	polytocous
Sugar glider	Petaurus breviceps	High	https://doi.org/10.21203/rs.3.rs-3117313/v1	yes	https://doi.org/10.1111/j.1558-5646.2007.00229.x / https://doi.org/10.1126/science.1238677	Plural	0.12755	-2.05925	<1	0.517	-0.659712	<1	https://doi.org/10.1111/j.1474-9726.2008.00442.x	6497	8.7791	<9	2	polytocous
Koala	Phascolarctos cinereus	High	https://doi.org/10.21203/rs.3.rs-3117313/v1	no	https://doi.org/10.1093/beheco/arq216		5.64687	1.7311	>1	5.744	1.74816	>1	https://doi.org/10.1111/j.1474-9726.2008.00442.x	8066.5	8.99547	<9	1.005	monotocous
Lion mountain	Puma concolor	High	https://doi.org/10.21203/rs.3.rs-3117313/v1	no	https://doi.org/10.1111/j.1558-5646.2007.00229.x / https://doi.org/10.1126/science.1238677	Singular	48	3.8712	>1	49.326	3.89845	>1	https://doi.org/10.1111/j.1474-9726.2008.00442.x	8687	9.06958	>9	2.76	polytocous
Tasmanian devil	Sarcophilus harrisii	High	https://doi.org/10.1016/j.cell.2011.11.065	no	https://doi.org/10.1371/journal.pone.0230216		6.5	1.8718	>1	8.664	2.15918	>1	https://doi.org/10.1111/j.1474-9726.2008.00442.x	4766.29	8.46932	<9	2.94	polytocous
Red ruffed lemur	Varecia rubra	High	https://doi.org/10.21203/rs.3.rs-3117313/v1	yes	https://doi.org/10.1111/j.1558-5646.2007.00229.x / https://doi.org/10.1126/science.1238677	Plural	3.67	1.30019	>1					13206.9	9.4885	>9	2.2	polytocous
Fennec fox	Vulpes zerda	High	https://doi.org/10.21203/rs.3.rs-3117313/v1	yes	https://doi.org/10.1007/BF00344981	Singular	1.2075	0.188552	<1	2.693	0.990656	<1	https://doi.org/10.1111/j.1474-9726.2008.00442.x	5949.5	8.69106	<9	2.36	polytocous
Feathertail glider (Pygmy gliding possum)	Acrobates pygmaeus	Low	https://doi.org/10.21203/rs.3.rs-3117313/v1	yes	https://doi.org/10.1111/j.1558-5646.2007.00229.x / https://doi.org/10.1126/science.1238677	Plural	0.013	-4.34281	<1	0.084	-2.47694	<1	https://doi.org/10.1111/j.1474-9726.2008.00442.x	3212	8.07465	<9	3	polytocous
Red panda	Ailurus fulgens	Low	https://doi.org/10.21203/rs.3.rs-3117313/v1	no	https://doi.org/10.1111/j.1558-5646.2007.00229.x / https://doi.org/10.1126/science.1238677	Singular	4.74754	1.55763	>1	4.898	1.58883	>1	https://doi.org/10.1111/j.1474-9726.2008.00442.x	6935	8.84434	<9	2	polytocous
Bowhead whale	Balaena mysticetus	Low	https://doi.org/10.1038%2Fs41568-018-0004-9			Plural	80000	11.2898	>1	3213	8.07496	>1	https://doi.org/10.1016/B978-0-12-818969-6.00016-9	77015	11.2518	>9	1	monotocous
Nubian ibex	Capra nubiana	Low	https://doi.org/10.21203/rs.3.rs-3117313/v1	yes	https://doi.org/10.1111/j.1558-5646.2007.00229.x / https://doi.org/10.1126/science.1238677	Plural	70.5234	4.25594	>1					8139.5	9.00448	>9	1.11	monotocous
Pigmy marmoset	Cebuella pygmaea	Low	https://doi.org/10.21203/rs.3.rs-3117313/v1	yes	https://doi.org/10.1111/j.1558-5646.2007.00229.x / https://doi.org/10.1126/science.1238677		0.11683	-2.14704	<1	0.599	-0.512494	<1	https://doi.org/10.1111/j.1474-9726.2008.00442.x	6789	8.82306	<9	1.98	polytocous
Linne’s two-toed sloth	Choloepus didactylus	Low	https://doi.org/10.21203/rs.3.rs-3117313/v1	no	https://doi.org/10.1111/j.1558-5646.2007.00229.x / https://doi.org/10.1126/science.1238677	Singular	6.25	1.83258	>1					13432	9.5054	>9	1	monotocous
Nine-banded armadillo	Dasypus novemcinctus	Low	https://doi.org/10.21203/rs.3.rs-3117313/v1	no	https://doi.org/10.1111/j.1558-5646.2007.00229.x / https://doi.org/10.1126/science.1238677	Singular	3.94901	1.37346	>1	4.655	1.53794	>1	https://doi.org/10.1111/j.1474-9726.2008.00442.x	8151.67	9.00598	>9	4	polytocous
Common dolphin	Delphinus delphis	Low	https://doi.org/10.21203/rs.3.rs-3117313/v1	yes	https://doi.org/10.1111/j.1558-5646.2007.00229.x / https://doi.org/10.1126/science.1238677	Plural	77.8183	4.35438	>1					10594.1	9.26805	>9	0.99	monotocous
Vampire bat	Desmodus rotundus	Low	https://doi.org/10.21203/rs.3.rs-3117313/v1	yes	https://doi.org/10.1111/j.1558-5646.2007.00229.x / https://doi.org/10.1126/science.1238677	Plural	0.03318	-3.40581	<1	0.194	-1.6399	<1	https://doi.org/10.1111/j.1474-9726.2008.00442.x	10658	9.27407	>9	1	monotocous
Asian elephant	Elephas maximus	Low	https://doi.org/10.1038%2Fs41568-018-0004-9	yes	https://doi.org/10.1111/j.1558-5646.2007.00229.x / https://doi.org/10.1126/science.1238677	Plural	3220	8.07714	>1	2336.5	7.75641	>1	https://doi.org/10.1111/j.1474-9726.2008.00442.x	29200	10.2819	>9	1	monotocous
Sea otter	Enhydra lutris	Low	https://doi.org/10.1016%2FB978-0-12-804310-3.00002-8			Singular	27.4109	3.31094	>1	98.479	4.58984	>1	https://doi.org/10.1111/j.1474-9726.2008.00442.x	10950	9.30109	>9	1	monotocous
Short-finned pilot whale	Globicephala macrorhynchus	Low	https://doi.org/10.1289/ehp.02110285 / https://doi.org/10.1093/icb/icm062	yes	https://doi.org/10.1111/j.1558-5646.2007.00229.x / https://doi.org/10.1126/science.1238677	Plural	726	6.58755	>1					22995	10.043	>9	1	monotocous
Naked mole rat	Heterocephalus glaber	Low	https://doi.org/10.1038%2Fs41568-018-0004-9	yes	https://doi.org/10.1007/s002650050669	Singular	0.035	-3.35241	<1	0.128	-2.05573	<1	https://doi.org/10.1111/j.1474-9726.2008.00442.x	10329.5	9.24276	>9	8.95	polytocous
Striped grass mouse	Lemniscomys striatus	Low	https://doi.org/10.21203/rs.3.rs-3117313/v1				0.0423	-3.16297	<1					1761.12	7.47371	<9	4.54	polytocous
African elephant	Loxodonta africana	Low	https://doi.org/10.1038%2Fs41568-018-0004-9	yes	https://doi.org/10.1111/j.1558-5646.2007.00229.x / https://doi.org/10.1126/science.1238677	Plural	4565	8.42617	>1	1410.93	7.252	>1	https://doi.org/10.1242/jeb.198.3.629	29200	10.2819	>9	1	monotocous
Sulawesi crested macaque	Macaca nigra	Low	https://doi.org/10.21203/rs.3.rs-3117313/v1	yes	https://doi.org/10.1111/j.1558-5646.2007.00229.x / https://doi.org/10.1126/science.1238677	Plural	7.66219	2.0363	>1					12410	9.42626	>9	1	monotocous
Parma wallaby	Macropus parma	Low	https://doi.org/10.21203/rs.3.rs-3117313/v1				4.20331	1.43587	>1					5803.5	8.66622	<9	0.95	monotocous
Short-eared elephant shrew	Macroscelides proboscideus	Low	https://doi.org/10.21203/rs.3.rs-3117313/v1	no	https://doi.org/10.1111/j.1558-5646.2007.00229.x / https://doi.org/10.1126/science.1238677	Singular	0.0395	-3.23145	<1	0.292	-1.231	<1	https://doi.org/10.1111/j.1474-9726.2008.00442.x	3175.5	8.06322	<9	1.6	polytocous
California leaf nosed bat	Macrotus californicus	Low	https://doi.org/10.21203/rs.3.rs-3117313/v1				0.012	-4.42285	<1	0.082	-2.50104	<1	https://doi.org/10.1111/j.1474-9726.2008.00442.x	6375.33	8.76019	<9	1	monotocous
Silvery marmoset	Mico argentatus	Low	https://doi.org/10.21203/rs.3.rs-3117313/v1				0.35725	-1.02932	<1					6132	8.72128	<9	1.87	polytocous
Common field vole	Microtus arvalis	Low	https://doi.org/10.21203/rs.3.rs-3117313/v1	yes	https://doi.org/10.1111/j.1558-5646.2007.00229.x / https://doi.org/10.1126/science.1238677	Plural	0.0254	-3.67301	<1	0.343	-1.07002	<1	https://doi.org/10.1111/j.1474-9726.2008.00442.x	1752	7.46851	<9	5.1	polytocous
Common dormouse	Muscardinus avellanarius	Low	https://doi.org/10.21203/rs.3.rs-3117313/v1	no	https://doi.org/10.1111/j.1558-5646.2007.00229.x / https://doi.org/10.1126/science.1238677	Singular	0.027315	-3.60032	<1	0.351	-1.04697	<1	https://doi.org/10.1111/j.1474-9726.2008.00442.x	2190	7.69166	<9	4.3	polytocous
Killer whale	Orcinus orca	Low	https://doi.org/10.21203%2Frs.3.rs-3117313%2Fv1 / https://doi.org/10.1093/icb/icm062 / https://doi.org/10.1289/ehp.02110285	yes	https://doi.org/10.1111/j.1558-5646.2007.00229.x / https://doi.org/10.1126/science.1238677	Plural	4300	8.36637	>1	2274.9	7.72969	>1	https://doi.org/10.1111/mms.12091	36500	10.5051	>9	1	monotocous
Bighorn sheep	Ovis canadensis	Low	https://doi.org/10.21203/rs.3.rs-3117313/v1	yes	https://doi.org/10.1016/S0003-3472(05)80607-4	Plural	69.125	4.23592	>1	114.674	4.74209	>1	https://doi.org/10.1111/j.1474-9726.2008.00442.x	8760	9.07795	>9	1.03	monotocous
Atlantic harbor seal	Phoca vitulina	Low	https://doi.org/10.21203/rs.3.rs-3117313/v1	yes	https://doi.org/10.1111/j.1558-5646.2007.00229.x / https://doi.org/10.1126/science.1238677	Plural	94.2833	4.5463	>1	73.29	4.29442	>1	https://doi.org/10.1111/j.1474-9726.2008.00442.x	17374	9.76273	>9	1	monotocous
Common porpoise	Phocoena phocoena	Low	https://doi.org/10.21203/rs.3.rs-3117313/v1			Plural	52.7309	3.9652	>1	107.675	4.67912	>1	https://doi.org/10.1111/j.1474-9726.2008.00442.x	7446	8.91543	<9	1	monotocous
Pale spear nosed bat	Phyllostomus discolor	Low	https://doi.org/10.21203/rs.3.rs-3117313/v1	yes	https://doi.org/10.1111/j.1558-5646.2007.00229.x / https://doi.org/10.1126/science.1238677	Plural	0.04005	-3.21763	<1	0.267	-1.32051	<1	https://doi.org/10.1111/j.1474-9726.2008.00442.x	3285	8.09712	<9	1	monotocous
White-faced saki monkey	Pithecia pithecia	Low	https://doi.org/10.21203/rs.3.rs-3117313/v1	yes	https://doi.org/10.1002/ajp.22360	Singular	1.48	0.392042	<1				https://doi.org/10.1111/j.1474-9726.2008.00442.x	13206.9	9.4885	>9	1	monotocous
Rodrigues fruit bat	Pteropus rodricensis	Low	https://doi.org/10.21203/rs.3.rs-3117313/v1	yes	https://doi.org/10.1111/j.1558-5646.2007.00229.x / https://doi.org/10.1126/science.1238677	Plural	0.303085	-1.19374	<1	0.753	-0.28369	<1	https://doi.org/10.1111/j.1474-9726.2008.00442.x	10950	9.30109	>9	1	monotocous
Black-capped squirrel monkey	Saimiri boliviensis	Low	https://doi.org/10.21203/rs.3.rs-3117313/v1	yes	https://doi.org/10.1111/j.1558-5646.2007.00229.x / https://doi.org/10.1126/science.1238677	Plural	0.799725	-0.223487	<1					11059.5	9.31105	>9	1	monotocous
Gray squirrel	Sciurus carolinensis	Low	https://doi.org/10.1038%2Fs41568-018-0004-9	no	https://doi.org/10.1111/j.1558-5646.2007.00229.x / https://doi.org/10.1126/science.1238677	Singular	0.54033	-0.615575	<1	2.062	0.723676	<1	https://doi.org/10.1111/j.1474-9726.2008.00442.x	8760	9.07795	>9	3	polytocous
Blind mole rat	Spalax ehrenbergi	Low	https://doi.org/10.1038%2Fs41568-018-0004-9	no	https://doi.org/10.1111/j.1558-5646.2007.00229.x / https://doi.org/10.1126/science.1238677	Singular	0.162175	-1.81908	<1	0.585	-0.536143	<1	https://doi.org/10.1111/j.1474-9726.2008.00442.x	5645.33	8.63858	<9	3.24	polytocous
Kudu	Tragelaphus strepsiceros	Low	https://doi.org/10.21203/rs.3.rs-3117313/v1	yes	https://doi.org/10.1111/j.1558-5646.2007.00229.x / https://doi.org/10.1126/science.1238677	Plural	206.056	5.32815	>1					8577.5	9.0569	>9	1	monotocous

## Sheet: References
Variable	Note	Reference
malignancy_prevalence	See reference for each species	-
adult_mass_g	-	https://doi.org/10.1002/ecy.3344
max_lifespan_d	(** marked as an exception, data from https://doi.org/10.1111/j.1474-9726.2008.00442.x)	https://doi.org/10.1002/ecy.3344
litter_size	-	https://doi.org/10.1002/ecy.3344
metabolic_rate_W	See reference for each species	-
breeding_system	-	https://doi.org/10.1093/beheco/araa039
litters	Calculated (see "Methods")	-
group_living	See reference for each species	-

## Sheet: Metadata
Variable	Definition	Data type
common_name	Widely recognized or vernacular name of a species, used to identify it in everyday language, as opposed to its scientific name.	Character
species	Binomial scientific name of the species.	Character
malignancy_prevalence	A variable indicating whether a species has reported low or high cancer incidence. This classification is based on a review of available literature and reflects the frequency of cancer occurrences within that species.	Numeric
malignancy_prevalence_reference	A reference indicating the source of information regarding malignancy prevalence.	Character
adult_mass_kg	Body mass of an adult individual in kilograms.	Numeric
log_adult_mass_kg	The natural logarithm of the adult mass in kilograms.	Numeric
log_adult_mass_kg_category	Categorization of adult mass based on logarithmic values: <1 (small) or >1 (large).	Binary (<1, >1)
max_lifespan_d	Maximum reported age at death for the species in days.	Numeric
log_max_lifespan_d	The natural logarithm of the maximum lifespan in days.	Numeric
log_max_lifespan_d_category	Categorization of lifespan based on logarithmic values: <9 (short-lived) or >9 (long-lived).	Binary (<9, >9)
litter_size	Number of offspring born per litter per female.	Numeric
metabolic_rate_W	Metabolic rate of the species in Watts (W).	Numeric
log_metabolic_rate_W	The natural logarithm of the metabolic rate in Watts.	Numeric
log_metabolic_rate_W_category	Categorization of metabolic rate based on logarithmic values: <1 (low) or >1 (high).	Binary (<1, >1)
metabolic_rate_reference	A reference indicating the source of information regarding metabolic rate.	Character
breeding_system	A variable indicating whether females occupy a shared territory or separate territories during the breeding season. It is categorized as either SingularBreeder (females in separate territories) or PluralBreeder (females in a common territory).	Binary (SingularBreeder, PluralBreeder)
litters	A classification variable that distinguishes species based on their litter size. It categorizes species as either "monotocous" (typically producing one offspring per litter) or "polytocous" (producing more than one offspring per litter), with a litter size threshold of 1.5.	Binary (monotocous, polytocous)
group_living	A variable indicating whether a species lives in social groups with regular interactions among individuals. It is categorized as either "yes" (the species engages in group living) or "no" (the species does not).	Binary (yes, no)
group_living_reference	A reference indicating the source of information regarding group living behavior.	Character
*Values referred to as NA mean data is not available
