# Supplementary material for: Coevolution of cooperative lifestyles and low cancer incidence in mammals
Source: Research Square preprint supplement (doi:10.21203/rs.3.rs-5241807/v1), 2024-10-14
Supplement: Supplementary file 3 [file 78bdf63dfaac6ceee41743e2.xlsx]

## Sheet: Data
order	CMR_mean	CMR_median	index_gl	index_litters	index_BS	n_cancer	n_no_cancer	n_total
Carnivora	0.11	0.10	0.20	0.08	0.22	276.00	2581.00	2857.00
Rodentia	0.06	0.04	0.57	0.00	0.38	40.00	759.00	799.00
Primates	0.06	0.04	2.18	1.80	2.40	123.00	2302.00	2425.00
Artiodactyla	0.02	0.01	4.33	12.00	7.17	101.00	4298.00	4399.00

## Sheet: Metadata
Variable	Definition	Data type
order	Order name of the species grouped for the analysis. Only orders with more than 15 species were included.	Character
CMR_mean	Mean of the Adult cancer mortality risk.	Numeric
CMR_median	Median of the Adult cancer mortality risk.	Numeric
index_gl	Ratio between the species with and without Group Living within each order.	Numeric
index_litters	Ratio between monotocous and polytocous species within each order.	Numeric
index_BS	Ratio between plural and singular breeding species within each order.	Numeric
n_cancer	Total number of neoplasia cases recorded in each order, that were considered to be significant contributors to the death of the animals.	Numeric
n_no_cancer	Total number of dead individuals with pathological records ("n_total") substracting the total number of neoplasia cases ("n_cancer").	Numeric
n_total	Total number of dead individuals in the order whose pathological records were identified.	Numeric
