# Supplementary material for: Coevolution of cooperative lifestyles and low cancer incidence in mammals
Source: Research Square preprint supplement (doi:10.21203/rs.3.rs-5241807/v1), 2024-10-14
Supplement: Supplementary file 4 [file 8c100d4535d086963a16a9cb.xlsx]

## Sheet: Raw_data
species	order	CMR	n_dead_ind	known_deaths	n_neoplasia	n_no_neoplasia	body_mass_kg	metabolic_rate	life_expectancy_d	gestation_length_d	litter_size_n	total_litters	litters	breeding_system	paternal_care	group_living
Hippopotamus_amphibius	Artiodactyla	0	391	22	0	22	1499.45	NA	11385	234.685	1	34.5669	Monotocous	PluralBreeder	No	yes
Gorilla_gorilla	Primates	0.0455	679	22	1	21	136.96	NA	10705	257	1.005	14.3663	Monotocous	PluralBreeder	No	yes
Pan_troglodytes	Primates	0.0208	964	48	1	47	59.95	NA	10519.6	229	1.075	13.7677	Monotocous	PluralBreeder	No	yes
Pongo_pygmaeus	Primates	0.0909	332	22	2	20	79.39	NA	10468.8	259.42	1.14	13.03	Monotocous	SingularBreeder	No	no
Ateles_geoffroyi	Primates	0.1429	273	28	4	24	7.91	NA	8757.3	229.185	1	13.6374	Monotocous	PluralBreeder	No	yes
Hylobates_lar	Primates	125	383	24	3	21	7.5	NA	8411.62	216.243	1	24.5972	Monotocous	SingularBreeder	No	NA
Ateles_fusciceps	Primates	0.0952	289	21	2	19	9.19	NA	8212.16	227	1	21.5173	Monotocous	PluralBreeder	No	yes
Ursus_maritimus	Carnivora	0.0455	217	22	1	21	344.76	NA	7678.25	147.416	1.66	26.7255	Polytocous	SingularBreeder	No	no
Sapajus_apella	Primates	0.0263	550	38	1	37	3.66	NA	7343.08	158	1.05	25.9984	Monotocous	NA	NA	NA
Ursus_arctos	Carnivora	0.1	389	40	4	36	265.55	NA	6957.18	103	2.27	42.1151	Polytocous	SingularBreeder	No	no
Phoca_vitulina	Carnivora	0	319	20	0	20	73.5	73.29	6787.47	253.57	1	43.6595	Monotocous	PluralBreeder	No	yes
Choloepus_didactylus	Pilosa	0.0455	323	22	1	21	8.77	NA	6523.61	274.315	1	33.3182	Monotocous	SingularBreeder	No	no
Macaca_fuscata	Primates	0.0833	833	72	6	66	11.93	NA	6508.84	174	1.415	24.3642	Monotocous	PluralBreeder	No	yes
Varecia_rubra	Primates	0.1852	719	54	10	44	3.75	NA	6441.78	100.328	2.2	75.6689	Polytocous	PluralBreeder	No	yes
Tapirus_terrestris	Perissodactyla	0.0238	477	42	1	41	207.31	NA	5960.33	396.86	1	65.9111	Monotocous	SingularBreeder	No	no
Zalophus_californianus	Carnivora	0.0889	561	45	4	41	141.85	NA	5914.62	334.84	1.1	30.5418	Monotocous	PluralBreeder	No	yes
Alouatta_caraya	Primates	0.2	278	25	5	20	8.87	NA	5868.08	187	1	29.0707	Monotocous	PluralBreeder	No	yes
Macaca_silenus	Primates	0.0667	447	30	2	28	8.83	NA	5794.96	176	1	25.2007	Monotocous	PluralBreeder	No	yes
Leopardus_pardalis	Carnivora	0.1935	229	31	6	25	10.85	17.368	5783.08	80.351	1.66	43.7944	Polytocous	SingularBreeder	No	no
Varecia_variegata	Primates	0.0659	972	91	6	85	3.81	NA	5743.57	100.328	2.2	75.4856	Polytocous	PluralBreeder	No	yes
Tapirus_indicus	Perissodactyla	0.2	204	20	4	16	328.41	NA	5722.04	392	1	16.6983	Monotocous	SingularBreeder	No	no
Panthera_onca	Carnivora	0.2439	354	41	10	31	57.1	62.419	5659.18	100.745	2	25.8841	Polytocous	SingularBreeder	No	no
Theropithecus_gelada	Primates	0	363	22	0	22	18.02	NA	5585.56	172.417	1	16.0821	Monotocous	PluralBreeder	No	yes
Eidolon_helvum	Chiroptera	0.1429	569	35	5	30	0.3	NA	5507.59	219.68	1.04	21.1818	Monotocous	PluralBreeder	No	yes
Eulemur_macaco	Primates	0.12	232	25	3	22	2.47	NA	5478.84	127.245	1.04	38.8379	Monotocous	PluralBreeder	No	yes
Equus_quagga	Perissodactyla	0.0097	1343	103	1	102	294.23	NA	5446.34	366.485	1	22.8904	Monotocous	NA	NA	yes
Lemur_catta	Primates	0.0677	3668	251	17	234	2.87	NA	5396.88	134.838	1.105	37.7653	Monotocous	PluralBreeder	No	yes
Arctictis_binturong	Carnivora	0.1481	291	27	4	23	17.21	12.747	5238.72	92	2.5	123.329	Polytocous	NA	NA	NA
Pteropus_vampyrus	Chiroptera	0.1667	299	24	4	20	1.15	4.486	5213.51	165.39	1	19.1238	Monotocous	PluralBreeder	No	yes
Panthera_pardus	Carnivora	0.05	721	100	5	95	43.31	NA	5159.85	97	2.14	52.9284	Polytocous	SingularBreeder	No	no
Pithecia_pithecia	Primates	0	538	38	0	38	1.96	NA	5126.24	159.565	1	33.8891	Monotocous	SingularBreeder	No	no
Syncerus_caffer	Artiodactyla	0	305	22	0	22	441.58	NA	5026.79	333.355	1.08	11.1278	Monotocous	PluralBreeder	No	yes
Hystrix_indica	Rodentia	0.0976	446	41	4	37	17.61	NA	4995.71	113	2	103.984	Polytocous	SingularBreeder	No	no
Papio_hamadryas	Primates	25	1046	40	1	39	20.45	21.095	4958.02	179.277	1	32.53	Monotocous	PluralBreeder	No	yes
Lynx_lynx	Carnivora	0.0882	502	34	3	31	20.5	NA	4925.26	66.495	2.25	56.361	Polytocous	SingularBreeder	No	no
Equus_grevyi	Perissodactyla	0.0385	496	52	2	50	389.48	NA	4916.47	405.714	1	13.7576	Monotocous	PluralBreeder	No	no
Macaca_sylvanus	Primates	0	420	33	0	33	12.67	NA	4835.5	164.42	1.5	37.6602	Monotocous	PluralBreeder	No	yes
Macaca_fascicularis	Primates	0.0357	265	28	1	27	6.94	NA	4822.26	165	1	33.0118	Monotocous	PluralBreeder	No	yes
Cercopithecus_neglectus	Primates	125	230	24	3	21	8.63	NA	4767.77	176.004	1	26.3863	Monotocous	PluralBreeder	No	yes
Heterocephalus_glaber	Rodentia	0.0233	632	43	1	42	0.05	128	4726.02	70	8.95	866.93	Polytocous	SingularBreeder	Yes	no
Bison_bison	Artiodactyla	0.0548	985	73	4	69	632.05	NA	4678.87	274	1	31.0014	Monotocous	PluralBreeder	No	yes
Panthera_leo	Carnivora	0.1275	2084	204	26	178	161.94	94.58	4678.41	109	2.825	76.275	Polytocous	PluralBreeder	No	yes
Colobus_guereza	Primates	38	694	79	3	76	11.88	17.037	4653.31	180	1	23.6515	Monotocous	PluralBreeder	No	yes
Macaca_nigra	Primates	0	286	24	0	24	9.95	NA	4607.74	175.96	1	20.5264	Monotocous	PluralBreeder	No	yes
Giraffa_camelopardalis	Artiodactyla	0.0123	1836	163	2	161	911.6	NA	4568.44	456.125	1.12	21.6025	Monotocous	PluralBreeder	No	NA
Lontra_canadensis	Carnivora	0.1364	214	22	3	19	8.37	NA	4481.42	61.176	2.67	62.745	Polytocous	SingularBreeder	No	no
Hystrix_africaeaustralis	Rodentia	25	329	40	1	39	15.85	13.175	4472.39	93.49	2.1	76.799	Polytocous	SingularBreeder	No	no
Pteropus_lylei	Chiroptera	0	323	23	0	23	0.46	NA	4444.7	153.368	1.015	34.7655	Monotocous	NA	NA	NA
Leptailurus_serval	Carnivora	98	400	51	5	46	11.91	1.44	4402.02	71.829	2.35	121.91	Polytocous	SingularBreeder	No	no
Puma_concolor	Carnivora	0.1176	225	34	4	30	50.94	49.326	4386.41	92.3	2.76	27.6321	Polytocous	SingularBreeder	No	no
Equus_hemionus	Perissodactyla	0.0303	309	33	1	32	222.71	NA	4329.82	346	1	24.9411	Monotocous	PluralBreeder	No	yes
Equus_zebra	Perissodactyla	0	212	24	0	24	323.98	NA	4320.68	363.49	1	18.2614	Monotocous	PluralBreeder	No	yes
Pygathrix_nemaeus	Primates	0	104	21	0	21	11.99	NA	4313.66	182.88	1	22.8973	Monotocous	PluralBreeder	No	yes
Saimiri_boliviensis	Primates	0.0071	1214	140	1	139	0.94	NA	4289.56	162.545	1	29.2239	Monotocous	PluralBreeder	No	yes
Muntiacus_muntjak	Artiodactyla	0	293	27	0	27	23.79	NA	4266.89	210	1.17	28.5175	Monotocous	SingularBreeder	No	no
Panthera_tigris	Carnivora	0.1327	1671	196	26	170	121.44	133.859	4239.66	105.19	2.57	23.4652	Polytocous	SingularBreeder	No	no
Erythrocebus_patas	Primates	0.0588	241	34	2	32	10.49	5.958	4237.94	167.2	1	25.6212	Monotocous	PluralBreeder	No	yes
Panthera_uncia	Carnivora	0.0989	573	91	9	82	36.94	NA	4229.79	97.915	2.12	40.3793	Polytocous	NA	No	no
Neofelis_nebulosa	Carnivora	0.2609	286	23	6	17	17.89	NA	4215.39	93.134	2.25	68.3178	Polytocous	SingularBreeder	NA	NA
Cervus_canadensis	Artiodactyla	0	407	39	0	39	322.71	NA	4139.74	244.401	1.035	27.3188	Monotocous	NA	NA	NA
Bison_bonasus	Artiodactyla	0.0408	497	49	2	47	489.7	NA	4130.22	274	1	31.0014	Monotocous	PluralBreeder	No	yes
Budorcas_taxicolor	Artiodactyla	0.0357	399	28	1	27	288.53	NA	4042.38	235.6	1.17	22.6961	Monotocous	PluralBreeder	No	yes
Oryx_beisa	Artiodactyla	0	190	22	0	22	146.78	NA	4041.11	168	1	41.9985	Monotocous	NA	No	yes
Otocyon_megalotis	Carnivora	0.2609	201	23	6	17	4.81	NA	4006.59	68	4	135.062	Polytocous	SingularBreeder	Yes	NA
Saimiri_sciureus	Primates	0.0316	1072	95	3	92	0.92	4.429	3961.63	164.09	1	29.1169	Monotocous	PluralBreeder	No	yes
Leontopithecus_rosalia	Primates	0	705	78	0	78	0.68	NA	3919.97	132.397	1.95	101.72	Polytocous	SingularBreeder	Yes	no
Procyon_lotor	Carnivora	0.2	554	55	11	44	6.68	10.428	3894.25	63.914	3.39	67.8	Polytocous	SingularBreeder	No	no
Leontopithecus_chrysomelas	Primates	0.0702	522	57	4	53	0.75	NA	3777.11	132.397	1.95	101.72	Polytocous	NA	Yes	no
Prionailurus_viverrinus	Carnivora	0.05	249	20	1	19	10.18	NA	3726.89	71.43	2	63.6541	Polytocous	NA	No	no
Pteropus_giganteus	Chiroptera	37	188	27	1	26	0.65	1.622	3722.03	155.795	995	39.6012	Monotocous	PluralBreeder	No	yes
Desmodus_rotundus	Chiroptera	0.0769	324	39	3	36	0.03	194	3650.27	189	1	35.8082	Monotocous	PluralBreeder	No	yes
Pteropus_rodricensis	Chiroptera	0.0103	1223	97	1	96	0.35	753	3647.13	198	1	27.9311	Monotocous	PluralBreeder	No	yes
Cervus_elaphus	Artiodactyla	0	595	61	0	61	181.85	112.43	3589.92	244.401	1.035	27.3188	Monotocous	PluralBreeder	No	yes
Nycticebus_pygmaeus	Primates	0.1875	287	32	6	26	0.56	NA	3585.03	188	1.12	27.9064	Monotocous	SingularBreeder	No	no
Ailurus_fulgens	Carnivora	0.0707	1068	99	7	92	5.98	4.898	3580.26	123.437	2	34.8663	Polytocous	SingularBreeder	No	no
Felis_margarita	Carnivora	0.1212	211	33	4	29	2.79	NA	3559.46	66.959	4.5	118.345	Polytocous	SingularBreeder	No	no
Felis_silvestris	Carnivora	25	346	40	1	39	3.64	NA	3555.1	64.719	3.69	202.42	Polytocous	SingularBreeder	No	no
Saguinus_bicolor	Primates	0	268	41	0	41	0.52	NA	3546.76	160	1.63	41.2331	Polytocous	NA	Yes	no
Saguinus_oedipus	Primates	0.0921	1451	152	14	138	0.57	NA	3538.22	177.873	1.9	46.5828	Polytocous	SingularBreeder	Yes	NA
Acinonyx_jubatus	Carnivora	0.0356	1560	225	8	217	42.55	61.77	3533.86	90.12	3.04	40.1318	Polytocous	SingularBreeder	No	no
Boselaphus_tragocamelus	Artiodactyla	0.05	444	40	2	38	203.68	NA	3532.2	255	1.5	30.6607	Monotocous	PluralBreeder	No	no
Rousettus_aegyptiacus	Chiroptera	125	515	24	3	21	0.14	684	3516.46	116	1.035	45.333	Monotocous	PluralBreeder	No	yes
Oryx_dammah	Artiodactyla	0.0164	1282	122	2	120	138.57	NA	3507.35	247	1	48.6662	Monotocous	PluralBreeder	No	yes
Caracal_caracal	Carnivora	0.0952	196	21	2	19	12.14	NA	3492.12	73.959	3	62.8673	Polytocous	NA	No	no
Vulpes_zerda	Carnivora	0.1429	454	42	6	36	1.36	2.693	3451.83	51	2.36	36.5667	Polytocous	SingularBreeder	No	NA
Oryx_leucoryx	Artiodactyla	0	578	56	0	56	86.61	NA	3425.35	243	1	29.1242	Monotocous	PluralBreeder	No	yes
Axis_porcinus	Artiodactyla	0.0345	361	29	1	28	36.35	NA	3381.52	226.748	1	23.7432	Monotocous	SingularBreeder	No	no
Callimico_goeldii	Primates	0.0674	760	89	6	83	0.56	NA	3343.54	153.495	1	25.3597	Monotocous	PluralBreeder	Yes	yes
Axis_axis	Artiodactyla	0.0811	819	74	6	68	59.14	NA	3332.79	226.745	1.03	19.7719	Monotocous	PluralBreeder	No	no
Kobus_ellipsiprymnus	Artiodactyla	0.0143	736	70	1	69	162.9	148.949	3330.55	270	1.05	32.6237	Monotocous	PluralBreeder	No	yes
Macropus_giganteus	Diprotodontia	0.12	230	25	3	22	38.03	NA	3315.54	36.28	1	23.1591	Monotocous	PluralBreeder	No	no
Connochaetes_gnou	Artiodactyla	0	158	30	0	30	131.52	NA	3279.07	258.723	1	19.1971	Monotocous	PluralBreeder	No	yes
Kobus_leche	Artiodactyla	0.0081	959	124	1	123	83.32	NA	3275.13	229.4	1	24.0179	Monotocous	PluralBreeder	No	yes
Nasua_nasua	Carnivora	0.0394	1098	127	5	122	5.09	5.591	3252.73	74.03	3.81	90.3027	Polytocous	PluralBreeder	No	yes
Aonyx_cinerea	Carnivora	61	1267	164	10	154	3.3	NA	3242.65	63.001	1.47	64.9864	Monotocous	NA	NA	NA
Canis_rufus	Carnivora	0.2581	194	31	8	23	25.44	NA	3223.19	67.807	4.245	91.9345	Polytocous	NA	Yes	no
Prionailurus_bengalensis	Carnivora	37	241	27	1	26	4.39	NA	3218.01	66.046	2.5	64.5983	Polytocous	SingularBreeder	No	no
Potamochoerus_porcus	Artiodactyla	0.0185	534	54	1	53	74.05	NA	3194.94	120	3	64.4785	Polytocous	SingularBreeder	No	yes
Odocoileus_virginianus	Artiodactyla	0	276	46	0	46	45.12	123.447	3189.76	201.39	1.71	37.8824	Polytocous	SingularBreeder	No	NA
Lutra_lutra	Carnivora	0	243	27	0	27	6.66	25.104	3164.1	62.635	2.035	41.7147	Polytocous	PluralBreeder	No	no
Ammotragus_lervia	Artiodactyla	0.0403	1298	124	5	119	67.44	NA	3157.15	151.807	1.22	50.3135	Monotocous	PluralBreeder	No	NA
Helogale_parvula	Carnivora	0	476	35	0	35	0.43	NA	3156.57	54.785	3.19	120.876	Polytocous	SingularBreeder	Yes	no
Saguinus_midas	Primates	0	387	25	0	25	0.53	NA	3145.25	132.62	2	54.0094	Polytocous	NA	Yes	no
Rucervus_eldii	Artiodactyla	0.0111	707	90	1	89	86.5	NA	3135.04	240.19	1.01	19.2339	Monotocous	NA	NA	NA
Addax_nasomaculatus	Artiodactyla	0.0357	762	84	3	81	110.63	NA	3127.89	276	1	25.6041	Monotocous	PluralBreeder	No	yes
Connochaetes_taurinus	Artiodactyla	0.0093	781	107	1	106	194.86	230.073	3117.78	253	1	23.2864	Monotocous	PluralBreeder	No	yes
Dama_mesopotamica	Artiodactyla	0.1	316	30	3	27	73.68	NA	3096.06	233	1.07	25.2399	Monotocous	NA	NA	NA
Oryx_gazella	Artiodactyla	0	396	47	0	47	164.36	NA	3094.84	168	1	41.9985	Monotocous	PluralBreeder	No	yes
Tragelaphus_oryx	Artiodactyla	0.0147	1014	136	2	134	373.02	NA	3094.01	271	1	27.6536	Monotocous	NA	NA	yes
Hippotragus_equinus	Artiodactyla	0	303	35	0	35	243.57	NA	3082.81	283.832	1	28.202	Monotocous	PluralBreeder	No	yes
Elaphurus_davidianus	Artiodactyla	0.0164	528	61	1	60	192.41	NA	3076.13	286.453	1.11	28.0271	Monotocous	NA	NA	NA
Pseudois_nayaur	Artiodactyla	0	304	34	0	34	45.35	NA	3074.35	159.74	1.5	45.9627	Monotocous	PluralBreeder	No	no
Chrysocyon_brachyurus	Carnivora	0.1286	393	70	9	61	25.9	NA	3063.38	64	3	64.4244	Polytocous	SingularBreeder	Yes	NA
Rucervus_duvaucelii	Artiodactyla	0	361	59	0	59	137.95	NA	3042.57	249.94	1	21.6935	Monotocous	PluralBreeder	No	yes
Phacochoerus_africanus	Artiodactyla	0.1778	362	45	8	37	91.63	NA	3034.37	168.245	3	86.924	Polytocous	PluralBreeder	No	yes
Ovibos_moschatus	Artiodactyla	0	149	32	0	32	262.37	NA	2993.99	258	1.01	19.624	Monotocous	PluralBreeder	No	yes
Kobus_megaceros	Artiodactyla	0.1231	500	65	8	57	76.27	NA	2981.97	235	1	19.1	Monotocous	NA	NA	NA
Mungos_mungo	Carnivora	0.0682	723	44	3	41	1.6	NA	2962.1	60.91	2.68	88.2179	Polytocous	PluralBreeder	Yes	yes
Cynictis_penicillata	Carnivora	0.0968	291	31	3	28	1.08	NA	2953.93	56.002	2	52.8	Polytocous	SingularBreeder	Yes	NA
Tragelaphus_eurycerus	Artiodactyla	0.0423	606	71	3	68	250.01	NA	2899.29	288	1	13.9927	Monotocous	PluralBreeder	No	yes
Cuon_alpinus	Carnivora	0.1429	437	49	7	42	19.92	NA	2870.34	61.5	4.3	68.1765	Polytocous	SingularBreeder	Yes	NA
Muntiacus_reevesi	Artiodactyla	0.0097	778	103	1	102	10.3	NA	2857.87	208.791	1	33.674	Monotocous	NA	No	no
Suricata_suricatta	Carnivora	0.0775	4234	413	32	381	1.04	1.729	2851.01	77	3.86	75.656	Polytocous	SingularBreeder	Yes	NA
Hippotragus_niger	Artiodactyla	0.0141	477	71	1	70	200.55	NA	2838.43	271	1	20.1459	Monotocous	PluralBreeder	No	yes
Bettongia_penicillata	Diprotodontia	0	280	21	0	21	1.06	3.132	2808.61	19.175	1	54.8449	Monotocous	NA	NA	NA
Microcebus_murinus	Primates	129	296	31	4	27	0.08	NA	2773.3	60.34	2.41	41.886	Polytocous	PluralBreeder	No	NA
Saguinus_imperator	Primates	0.0103	855	97	1	96	0.58	NA	2758.02	145	2	69.2324	Polytocous	SingularBreeder	Yes	no
Dasyprocta_azarae	Rodentia	0	380	24	0	24	3.15	10.521	2752.38	112.146	1.732	35.0476	Polytocous	NA	NA	NA
Rangifer_tarandus	Artiodactyla	0.0345	1023	87	3	84	107.42	119.66	2735.58	222.5	1.1	21.775	Monotocous	PluralBreeder	No	yes
Dama_dama	Artiodactyla	0.0207	1368	145	3	142	54.81	NA	2732.3	233	1.07	25.2399	Monotocous	PluralBreeder	No	yes
Cervus_nippon	Artiodactyla	0.0164	1239	122	2	120	68.95	NA	2727.23	223.66	1	24.8805	Monotocous	PluralBreeder	No	NA
Capra_ibex	Artiodactyla	0	366	42	0	42	55.66	NA	2727.22	169	1.18	18.9362	Monotocous	PluralBreeder	No	yes
Echinops_telfairi	Afrosoricida	0.0571	539	35	2	33	0.15	0.75	2720.27	57.828	5.49	100.122	Polytocous	SingularBreeder	No	no
Mico_argentatus	Primates	0.0357	203	28	1	27	0.37	NA	2689.83	144	1.87	66.6209	Polytocous	NA	NA	NA
Otocolobus_manul	Carnivora	0.0857	292	35	3	32	4.19	NA	2688.23	72.133	4.14	117.571	Polytocous	NA	NA	NA
Lycaon_pictus	Carnivora	0.1409	952	149	21	128	29.1	33.01	2649.61	72	7.495	112.964	Polytocous	SingularBreeder	Yes	NA
Petaurus_breviceps	Diprotodontia	0.1071	302	28	3	25	0.1	517	2622.54	16.34	2	44.2996	Polytocous	PluralBreeder	No	yes
Galago_senegalensis	Primates	0	356	25	0	25	0.21	764	2600.14	126.49	1.5	54.156	Monotocous	SingularBreeder	No	no
Saguinus_labiatus	Primates	0	210	32	0	32	0.59	NA	2551.53	147	1.9	42.6193	Polytocous	SingularBreeder	Yes	no
Speothos_venaticus	Carnivora	0.0313	289	32	1	31	7.59	NA	2546.02	67.89	4.13	109.233	Polytocous	NA	Yes	no
Callithrix_jacchus	Primates	0.0246	1001	122	3	119	0.38	848	2542.33	144	2.24	96.252	Polytocous	SingularBreeder	Yes	NA
Tragelaphus_strepsiceros	Artiodactyla	0.0336	700	119	4	115	193.46	NA	2528.44	225.536	1	21.9657	Monotocous	PluralBreeder	No	yes
Tragulus_javanicus	Artiodactyla	0	277	47	0	47	1.71	4.883	2498.25	144	1	25.3963	Monotocous	NA	No	no
Damaliscus_pygargus	Artiodactyla	0	407	68	0	68	71.26	NA	2480.66	243	1.25	30.1648	Monotocous	NA	NA	NA
Gazella_marica	Artiodactyla	0	405	33	0	33	16.23	NA	2476.22	169.221	1.39	25.4978	Monotocous	NA	NA	NA
Aepyceros_melampus	Artiodactyla	0.0573	1007	157	9	148	48.15	NA	2465.89	196.74	1	24.2918	Monotocous	PluralBreeder	No	yes
Tragelaphus_imberbis	Artiodactyla	0.0526	282	38	2	36	72.7	NA	2455.95	235	1	23.5461	Monotocous	PluralBreeder	No	yes
Rusa_alfredi	Artiodactyla	0.0286	178	35	1	34	40.39	NA	2446.06	249.588	1	24.7879	Monotocous	NA	NA	NA
Tragelaphus_angasii	Artiodactyla	0.0196	683	102	2	100	79.02	NA	2412.19	224	1	20.8866	Monotocous	PluralBreeder	No	yes
Callithrix_geoffroyi	Primates	0.0196	725	102	2	100	0.46	NA	2387.15	144	2.24	96.252	Polytocous	NA	Yes	no
Callosciurus_prevostii	Rodentia	0.0667	258	45	3	42	0.48	NA	2386.65	47.785	1.765	60.0506	Polytocous	NA	NA	NA
Nanger_dama	Artiodactyla	0.0187	656	107	2	105	52.06	NA	2331.08	208	1	29.6406	Monotocous	NA	NA	NA
Gazella_cuvieri	Artiodactyla	0	89	20	0	20	24.25	NA	2317.93	170.873	1.23	34.3047	Monotocous	NA	NA	NA
Antilope_cervicapra	Artiodactyla	0	1886	196	0	196	31.04	NA	2307.02	167.699	1	42.6025	Monotocous	PluralBreeder	No	yes
Capra_nubiana	Artiodactyla	0.0417	424	48	2	46	40.9	NA	2301.5	169	1.11	17.8129	Monotocous	PluralBreeder	No	yes
Macropus_rufus	Diprotodontia	0.1007	931	139	14	125	34.26	31.353	2275.31	33	1	38.8736	Monotocous	NA	NA	NA
Mustela_lutreola	Carnivora	0.1538	373	39	6	33	0.91	NA	2261.92	43.74	4.5	45.1196	Polytocous	SingularBreeder	No	no
Dasyprocta_leporina	Rodentia	0.0294	320	34	1	33	3.34	8.694	2236.38	106.39	1.875	63.5216	Polytocous	SingularBreeder	No	no
Capra_falconeri	Artiodactyla	0.0137	581	73	1	72	47.79	NA	2226.85	163.068	2	33.7748	Polytocous	PluralBreeder	No	yes
Capra_caucasica	Artiodactyla	0	384	58	0	58	65.53	NA	2178.04	164.253	1.1	19.4447	Monotocous	NA	NA	NA
Eudorcas_thomsonii	Artiodactyla	39	447	77	3	74	20.47	NA	2162.64	170.746	1	28.5	Monotocous	PluralBreeder	No	yes
Cebuella_pygmaea	Primates	0.0244	1170	164	4	160	0.15	599	2158.9	133.72	1.98	51.6634	Polytocous	NA	NA	yes
Madoqua_kirkii	Artiodactyla	0.0164	382	61	1	60	5.01	11.966	2140.7	172	1	33.3207	Monotocous	SingularBreeder	No	NA
Mico_melanurus	Primates	0.0476	70	21	1	20	0.38	NA	2116.19	144	1.87	66.6209	Polytocous	NA	NA	NA
Alces_alces	Artiodactyla	0	246	33	0	33	344.91	286.847	2103.78	241.975	1.28	35.8586	Monotocous	PluralBreeder	No	no
Gazella_dorcas	Artiodactyla	0.0769	266	39	3	36	13.03	NA	2083.34	156	1.22	27.2462	Monotocous	PluralBreeder	No	yes
Rousettus_leschenaultii	Chiroptera	0	116	24	0	24	0.09	NA	2073.84	118.33	1.005	26.8397	Monotocous	NA	NA	NA
Antilocapra_americana	Artiodactyla	0.0313	176	32	1	31	43.41	50.973	2057.88	247.445	1.89	26.4945	Polytocous	PluralBreeder	No	yes
Carollia_perspicillata	Chiroptera	0	367	33	0	33	0.02	0.24	2015.11	95	1	32.5863	Monotocous	PluralBreeder	No	yes
Pudu_puda	Artiodactyla	0	279	46	0	46	9.02	NA	2000.25	205.747	1.03	30.7826	Monotocous	SingularBreeder	No	no
Macropus_rufogriseus	Diprotodontia	12	1678	251	3	248	13.53	NA	1966.66	29.5	1.005	17.8832	Monotocous	NA	NA	NA
Gazella_subgutturosa	Artiodactyla	0	348	49	0	49	19.37	NA	1942.64	169.221	1.39	25.4978	Monotocous	PluralBreeder	No	yes
Hydrochoerus_hydrochaeris	Rodentia	0.0878	1027	148	13	135	49.47	36.754	1913.9	150.73	3.485	60.3157	Polytocous	NA	NA	NA
Procavia_capensis	Hyracoidea	0.0649	708	77	5	72	3.34	4.954	1839.65	226.449	2.44	32.7899	Polytocous	PluralBreeder	No	yes
Cynomys_ludovicianus	Rodentia	0.1613	436	31	5	26	1.01	2.358	1838.31	35.415	4.43	70.0469	Polytocous	PluralBreeder	No	yes
Gazella_leptoceros	Artiodactyla	0	141	26	0	26	14.92	NA	1835.87	167.29	1	22.2325	Monotocous	NA	NA	NA
Dolichotis_patagonum	Rodentia	0	1730	213	0	213	7.63	NA	1834.76	91	1.875	91.6592	Polytocous	SingularBreeder	No	yes
Litocranius_walleri	Artiodactyla	0.0357	181	28	1	27	25.6	NA	1757.56	204.15	1	22.0233	Monotocous	PluralBreeder	No	yes
Tupaia_belangeri	Scandentia	125	331	24	3	21	0.19	NA	1754.06	46	2	181.225	Polytocous	SingularBreeder	No	no
Antidorcas_marsupialis	Artiodactyla	6	654	166	1	165	29.85	NA	1728.06	169.49	1	20.387	Monotocous	PluralBreeder	No	yes
Macropus_parma	Diprotodontia	0	394	83	0	83	4.38	NA	1477.29	34.33	0.95	17.9038	Monotocous	NA	NA	NA
Mustela_nigripes	Carnivora	0.1111	309	45	5	40	0.92	NA	1471.5	43	3.395	41.0771	Polytocous	SingularBreeder	No	no
Pachyuromys_duprasi	Rodentia	0.05	137	20	1	19	0.06	NA	1455.81	20.4	4.06	135.215	Polytocous	NA	NA	NA
Sciurus_vulgaris	Rodentia	0.0357	222	28	1	27	0.36	NA	1387.36	38	4.43	123.841	Polytocous	NA	NA	NA
Ctenodactylus_gundi	Rodentia	0.0313	388	32	1	31	0.28	NA	1222.44	74	1.9	9.35945	Polytocous	PluralBreeder	No	yes
Macroscelides_proboscideus	Macroscelidea	0	432	27	0	27	0.04	292	1135.71	65	1.6	50.6108	Polytocous	SingularBreeder	No	no
Myocastor_coypus	Rodentia	37	280	27	1	26	5.54	NA	951.73	131.86	5.34	143.242	Polytocous	PluralBreeder	No	yes
Cricetus_cricetus	Rodentia	0.2083	1333	24	5	19	0.27	1.251	922.54	20	7.14	53.7366	Polytocous	SingularBreeder	No	no
Jaculus_jaculus	Rodentia	69	129	29	2	27	0.06	515	900.42	38	3.24	31.1255	Polytocous	SingularBreeder	No	no
Lagurus_lagurus	Rodentia	0.05	42	20	1	19	0.02	NA	402.17	20.088	4.5	83.72	Polytocous	SingularBreeder	No	no

## Sheet: References
Variable	Note	Reference
species		https://doi.org/10.1038/s41586-021-04224-5
order		https://doi.org/10.1038/s41586-021-04224-5
CMR		https://doi.org/10.1038/s41586-021-04224-5
n_dead_ind		https://doi.org/10.1038/s41586-021-04224-5
known_deaths		https://doi.org/10.1038/s41586-021-04224-5
n_neoplasia		https://doi.org/10.1038/s41586-021-04224-5
life_expectancy_d		https://doi.org/10.1038/s41586-021-04224-5
body_mass_kg		https://doi.org/10.1038/s41586-021-04224-5
metabolic_rate		https://doi.org/10.1093/nar/gkx1042
litter_size_n		https://doi.org/10.1002/ecy.3344
gestation_length_d		https://doi.org/10.1002/ecy.3344
total_litters	Calculated (see "Methods")	-
litters	Calculated (see "Methods")	-
breeding_system		https://doi.org/10.1093/beheco/araa039
paternal_care		https://doi.org/10.1093/beheco/araa039
group_living	Multiple references (see "Methods")	https://doi.org/10.1111/j.1558-5646.2007.00229.x / https://doi.org/10.1126/science.1238677

## Sheet: Metadata
Variable	Definition	Data type
species	Binomial scientific name of the species.	Character
order	Order name of the species.	Character
CMR	Adult cancer mortality risk. Takes values between 0 and 1.	Numeric
n_dead_ind	Total number of dead individuals per species in the database.	Numeric
known_deaths	Total number of dead individuals whose pathological records were identified.	Numeric
n_neoplasia	Total number of neoplasia cases recorded in each species, that were considered to be significant contributors to the death of the animals.	Numeric
n_no_neoplasia	Total number of dead individuals with pathological records ("known_deaths") substracting the total number of neoplasia cases ("n_neoplasia")	Numeric
life_expectancy_d	Average number of days lived after sexual maturity was reached, i.e. remaining life expectancy.	Numeric
body_mass_kg	Average female and male body mass in kilograms.	Numeric
metabolic_rate	Metabolic rate of the species in Watts (W).	Numeric
litter_size_n	Number of offspring born per litter per female.	Numeric
gestation_length_d	Duration of fetal growth in days.	Numeric
total_litters	Total Litters born per female in a lifetime. Calculated as the number of litters per year multiplied by litter size and the difference between the maximum longevity and female sexual maturity for each species.	Numeric
litters	A classification variable that distinguishes species based on their litter size. It categorizes species as either "monotocous" (typically producing one offspring per litter) or "polytocous" (producing more than one offspring per litter), with a litter size threshold of 1.5.	Binary (monotocous, polytocous)
breeding_system	A variable indicating whether females occupy a shared territory or separate territories during the breeding season. It is categorized as either SingularBreeder (females in separate territories) or PluralBreeder (females in a common territory).	Binary (SingularBreeder, PluralBreeder)
paternal_care	A variable indicating whether males provide care or assistance to offspring. It is categorized as either "Yes" (males provide paternal care) or "No" (males do not provide paternal care).	Binary (Yes, No)
group_living	A variable indicating whether a species lives in social groups with regular interactions among individuals. It is categorized as either "yes" (the species engages in group living) or "no" (the species does not).	Binary (yes, no)
*Values referred to as NA mean data is not available
